# Supplementary material
Source: HighWire-hosted journal article supplement (https://erj.ersjournals.com/content/59/5/2101017)
Supplement: inline-supplementary-material-1 [file inline-supplementary-material-1.pdf]

## **Supplementary material**

### **Long-term Outcomes of Adult Pulmonary Langerhans Cell Histiocytosis: A Prospective Cohort**

Amira Benattia, Emmanuelle Bugnet, Anouk Walter-Petrich, Constance de Margerie-Mellon, Véronique Meignin, Agathe Seguin-Givelet, Gwenaël Lorillon, Sylvie Chevret, Abdellatif Tazi

## Supplementary methods

### *Study design and patient evaluation during the study*

The following items were recorded for the study: demographics, smoking status, cannabis consumption, clinical symptoms and signs, Langerhans cell histiocytosis (LCH) localizations, high-resolution computed tomography (HRCT) findings, lung function tests, oxygen saturation and/or blood gas analyses, long-term oxygen supplementation, Doppler echocardiography and right heart catheterization (RHC) results, systemic treatments received for LCH, the presence of malignancies, the performance of lung transplantation and survival status (deceased or alive).

For patients whose last visit was prior to the end of the study, the vital status (alive vs. deceased) was assessed through a telephone call to the patient or the relevant general practitioner. Additionally, if needed, a query was sent to the city hall (registry of births and deaths) of the town in which the patient was born.

At the diagnosis of pulmonary Langerhans cell histiocytosis (PLCH), a thorough history was collected and a comprehensive physical examination including ENT and stomatology was systematically performed to detect extra-pulmonary LCH involvement. Apart from routine blood analyses (complete blood count, blood chemistry analysis with total protein, electrolyte, creatinine, bilirubin, alanine aminotransferase, aspartic aminotransferase, alkaline phosphatase,  $\gamma$ -glutamyl transpeptidase, C-reactive protein and fibrinogen levels and protein electrophoresis), specific investigations to evaluate extrathoracic LCH involvement were performed in individual cases based on clinical or biological suspicion [1, 2].

The differential diagnoses considered vary according to the patient's age, smoking habits, gender, clinical presentation, and lung HRCT pattern (nodulocystic, nodular or cystic) [3-5].

Briefly, in case of constitutional symptoms, infection is rigorously looked for (particularly mycobacteria, and pneumocystis *jiroveci* in case of lymphopenia). Bronchoscopy with BAL is performed to search for alternative diagnoses in case of predominant nodular, or cavitory nodules pattern at lung HRCT (infection, cavitory metastatic carcinoma, sarcoidosis or granulomatous polyangiitis...). In purely cystic presentation, LAM (either sporadic or associated with tuberous sclerosis) is the main alternative diagnosis in females. In both genders, the principal other diagnoses to consider are Birt-Hogg-Dubé syndrome, lymphoid interstitial pneumonia. Amyloidosis and light chain cystic lung disease are considered in an appropriate context. At the end of this process, in the absence of straightforward diagnosis, a surgical lung biopsy is performed, if the patients' respiratory function allows it.

LCH lung involvement was assessed by chest imaging, lung function measurement, oxygen saturation and/or blood gas analyses. The 6-minute walk test and Doppler echocardiography were indicated in patients with unexplained dyspnoea or isolated/disproportionate decrease in diffusing capacity for carbon monoxide ( $D_{LCO}$ ) to detect pulmonary hypertension (PH), and if needed, PH was confirmed by cardiac catheterization [1, 6].

Follow-up visits systematically comprised assessment of smoking status, a comprehensive physical examination, chest radiography and lung function, including  $D_{LCO}$  measurement. Serial lung HRCT was indicated in case of changes in clinical, chest radiography or functional status during follow-up [1, 6]. For patients with unexplained dyspnoea or an isolated/disproportionate decrease in  $D_{LCO}$ , a Doppler echocardiography was also performed to detect PH [1, 6]. During the study, the median number of lung HRCT examinations performed was 3, (IQR 2; 5), corresponding to 0.8 HRCT examinations/patient/year of follow-up. One hundred forty-six (71%) patients had at least one Doppler echocardiography examination. For

these patients, the median number of Doppler echocardiography examinations performed was 2 (IQR 1; 4), corresponding to one Doppler echocardiography examination/patient every two years during the study period.

## Supplementary tables

### Supplementary Table S1. Univariable analyses of the associations of baseline characteristics of

PLCH patients with survival

|                                           | Number<br>of<br>deaths* | Value                  | HR   | 95% CI      | P-<br>Value |
|-------------------------------------------|-------------------------|------------------------|------|-------------|-------------|
| Age                                       | 12                      |                        | 1.09 | 1.05; 1.14  | <0.0001     |
| Sex                                       | 12                      | M                      | 1.00 |             |             |
|                                           |                         | F                      | 0.50 | 0.16; 1.58  | 0.24        |
| Smoking exposure, pack-years              | 11                      |                        | 1.05 | 1.02; 1.07  | 0.001       |
| Isolated PLCH                             | 12                      |                        | 0.95 | 0.26; 3.52  | 0.94        |
| Chronic respiratory failure               | 12                      | No                     | 1.00 |             |             |
|                                           |                         | Yes                    | 10   | 2.16; 46.37 | 0.003       |
| TLC, % predicted, n = 152                 | 11                      |                        | 0.96 | 0.92; 1.01  | 0.088       |
| RV, % predicted, n = 150                  | 11                      |                        | 1.00 | 0.98; 1.02  | 0.96        |
| RV/TLC, % predicted, n = 150              | 11                      |                        | 1.01 | 0.99; 1.03  | 0.30        |
| FVC, % predicted, n = 158                 | 10                      |                        | 0.97 | 0.94; 1.00  | 0.056       |
| FEV <sub>1</sub> , % predicted, n = 167   | 11                      |                        | 0.97 | 0.94; 0.99  | 0.020       |
| FEV <sub>1</sub> /FVC %, n = 158          | 10                      |                        | 0.94 | 0.89; 0.98  | 0.008       |
| D <sub>LCO</sub> , % predicted, n = 127   | 6                       |                        | 0.90 | 0.84; 0.96  | 0.002       |
| Restriction                               | 11                      | No                     | 1.00 |             |             |
|                                           |                         | Yes                    | 2.67 | 0.66; 10.83 | 0.17        |
| Obstruction                               | 10                      | No                     |      |             |             |
|                                           |                         | Yes                    | 1.39 | 0.29; 6.56  | 0.68        |
| Air trapping                              | 11                      | No                     |      |             |             |
|                                           |                         | Yes                    | 1.80 | 0.55; 5.90  | 0.33        |
| HRCT nodular score <sup>†</sup> , n = 196 | 11                      | Low (0-6)              | 1.00 |             |             |
|                                           |                         | Intermediate (7-12)    | 0.94 | 0.24; 3.65  | 0.93        |
|                                           |                         | High (13-18)           | 0.86 | 0.11; 7.02  | 0.89        |
| HRCT cystic score <sup>‡</sup> , n = 196  | 11                      | Low (0-6)              | 1.00 |             |             |
|                                           |                         | Intermediate (7-12)    | 0.61 | 0.07; 5.10  | 0.65        |
|                                           |                         | High/very high (13-24) | 4.05 | 1.14; 14.35 | 0.03        |

\*Number of deaths that occurred according to the characteristic considered. <sup>†</sup>Maximal value of the nodular score = 18. <sup>‡</sup>Maximal value of the cystic score = 24.

PLCH: pulmonary Langerhans cell histiocytosis; HR: hazard ratio; CI: confidence interval; M = male; F: female; TLC: total lung capacity; RV: residual volume; FVC: forced vital capacity;

FEV<sub>1</sub>: forced expiratory volume in 1 second; D<sub>LCO</sub>: diffusing capacity for carbon monoxide;  
HRCT: high resolution computed tomography.

**Supplementary Table S2.** Univariable analyses of the associations of time-dependent characteristics of PLCH patients with survival

| <b>Characteristics<br/>(all evaluated at time t)</b> | <b>Number<br/>of<br/>deaths</b> | <b>Values</b> | <b>HR</b> | <b>95% CI</b> | <b>p-Value</b> |
|------------------------------------------------------|---------------------------------|---------------|-----------|---------------|----------------|
| Smoking status at time t                             | 12                              | Non-smoker    | 1.00      | 0.79; 7.89    | 0.12           |
|                                                      |                                 | Smoker        | 2.5       |               |                |
| Previous use of systemic treatment                   | 12                              | No            | 1.00      | 1.79; 17.79   | 0.003          |
|                                                      |                                 | Yes           | 5.64      |               |                |
| Previous use of cladribine                           | 12                              | No            | 1.00      | 1.25; 26.04   | 0.025          |
|                                                      |                                 | Yes           | 5.69      |               |                |
| FEV <sub>1</sub> (n = 167)                           | 11                              |               | 0.95      | 0.91; 0.98    | 0.003          |
| Age                                                  | 12                              |               | 1.09      | 1.05; 1.13    | <0.0001        |

PLCH: pulmonary Langerhans cell histiocytosis; HR: hazard ratio; CI: confidence interval;

FEV<sub>1</sub>: forced expiratory volume in 1 second.

**Supplementary Table S3.** Characteristics of the 14 PLCH patients with CRF and/or PH

| Patient | Age at diagnosis of PLCH, years | Sex | Smoking status at diagnosis | Smoking status at CRF | Long-term oxygen | Systemic treatment      | PH characteristics                    | Status Alive/Dead |
|---------|---------------------------------|-----|-----------------------------|-----------------------|------------------|-------------------------|---------------------------------------|-------------------|
| 1       | 58                              | M   | Former                      | Former                | Yes              | Steroids                | Confirmed (mPAP=41 mmHg)              | Dead              |
| 5       | 33                              | M   | Current                     | Current               | Yes              | None                    | Confirmed (mPAP=28 mmHg)              | Dead              |
| 6       | 47                              | M   | Current                     | Current               | No               | Cladribine              | Confirmed (mPAP=27 mmHg)              | Dead              |
| 7       | 48                              | M   | Current                     | Current               | No               | None                    | Probable (TRV=3.31 m/s; sPAP=53 mmHg) | Dead              |
| 8*      | 38                              | F   | Former                      | Former                | Yes              | Steroids                | Confirmed (mPAP=25 mmHg)              | Dead              |
| 9       | 72                              | F   | Current                     | Current               | Yes              | Cladribine <sup>†</sup> | Confirmed (mPAP=27 mmHg)              | Dead              |
| 10      | 49                              | F   | Current                     | No CRF                | No               | None                    | Probable (TRV=2.95 m/s; sPAP=40 mmHg) | Dead              |
| 20      | 19                              | M   | Current                     | Current               | Yes              | Steroids                | Confirmed (mPAP=34 mmHg)              | Alive             |
| 21      | 48                              | F   | Current                     | Current               | Yes              | Steroids                | Confirmed (mPAP=26 mmHg)              | Alive             |
| 22      | 51                              | F   | Current                     | No CRF                | No               | None                    | Probable (TRV=3.04 m/s; sPAP=47 mmHg) | Alive             |
| 23      | 43                              | M   | Current                     | Current               | No               | None                    | None                                  | Alive             |
| 24      | 59                              | F   | Current                     | Current               | No               | None                    | None                                  | Alive             |
| 25      | 33                              | M   | Current                     | Former                | Yes              | Cladribine              | None                                  | Alive             |
| 26      | 53                              | F   | Current                     | Current               | No               | Cladribine              | None                                  | Alive             |

\*This patient died one year after lung transplantation.

<sup>†</sup>This patient was previously treated with corticosteroids.

PLCH: pulmonary Langerhans cell histiocytosis; CRF: chronic respiratory failure; PH: pulmonary hypertension; M: male; F: female;

mPAP: mean pulmonary arterial pressure; TRV: tricuspid regurgitation velocity; sPAP: systolic pulmonary arterial pressure.



**Supplementary Table S4.** Type and time of occurrence of the 27 malignancies observed in 23 PLCH patients during the study

|                                        | <b>Before PLCH<br/>(n=11)</b> | <b>Concurrent<br/>with PLCH<br/>(n=6)</b> | <b>After PLCH<br/>(n=10)</b> |
|----------------------------------------|-------------------------------|-------------------------------------------|------------------------------|
| Time, median, (IQR),<br>years          | -3.13 (-6.2; -2.1)            | Concurrent                                | 4.1 (3.1; 5.0)               |
| <b>Solid neoplasms</b>                 |                               |                                           |                              |
| Anus                                   | 1                             |                                           |                              |
| Prostate                               | 1                             |                                           |                              |
| Colon                                  | 1                             |                                           |                              |
| Stomach                                | 1                             |                                           |                              |
| Lung                                   | 1                             | 3*                                        | 7                            |
| Thyroid                                | 1                             |                                           |                              |
| Spindle cell skin<br>carcinoma         | 1                             |                                           |                              |
| Breast                                 |                               |                                           | 3 <sup>†</sup>               |
| <b>Haematological<br/>malignancies</b> |                               |                                           |                              |
| Marginal zone<br>lymphoma              | 1                             |                                           |                              |
| Myelodysplasia                         | 1                             |                                           |                              |
| Myeloma                                | 1                             |                                           |                              |
| Skin lymphoma                          | 1                             |                                           |                              |
| CMML                                   |                               | 3                                         |                              |

\*Eight patients with lung carcinomas had histological confirmation of PLCH either before or at the time of lung surgery for their tumour. The remaining two patients (one patient with metastatic lung carcinoma confirmed on liver biopsy, and one patient with lymphangitic carcinomatosis and respiratory failure) had a typical nodulocystic pattern on lung HRCT at the time of PLCH diagnosis.

<sup>†</sup>One patient with breast carcinoma had histological confirmation of PLCH and the remaining two patients presented a typical nodulocystic pattern on lung HRCT at the time of PLCH diagnosis.

PLCH: pulmonary Langerhans cell histiocytosis; IQR: interquartile range; CMML: chronic myelomonocytic leukaemia.

**Supplementary figures**

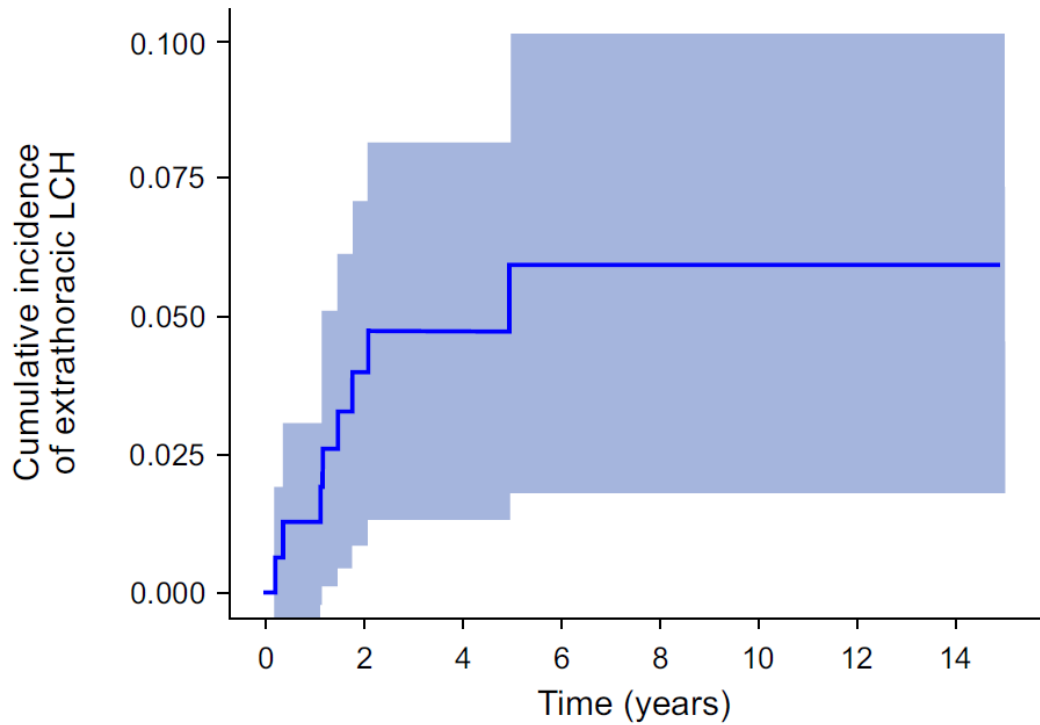

|                   |     |      |      |      |       |       |       |       |
|-------------------|-----|------|------|------|-------|-------|-------|-------|
| Number at risk    | 157 | 129  | 98   | 57   | 35    | 23    | 11    | 3     |
| (number censored) | (0) | (20) | (48) | (85) | (107) | (119) | (131) | (138) |

**Supplementary Figure S1.** Cumulative incidence during follow-up of extra-pulmonary LCH localizations among the 157 patients with isolated PLCH at diagnosis. LCH involved the bone (n = 5), pituitary stalk with diabetes insipidus (n =3) or liver (n = 1). The patient with liver involvement, which occurred 2.1 years after diagnosis, also developed diabetes insipidus 4.3 years later. The shaded area represents the 95% confidence interval.

PLCH: pulmonary Langerhans cell histiocytosis.

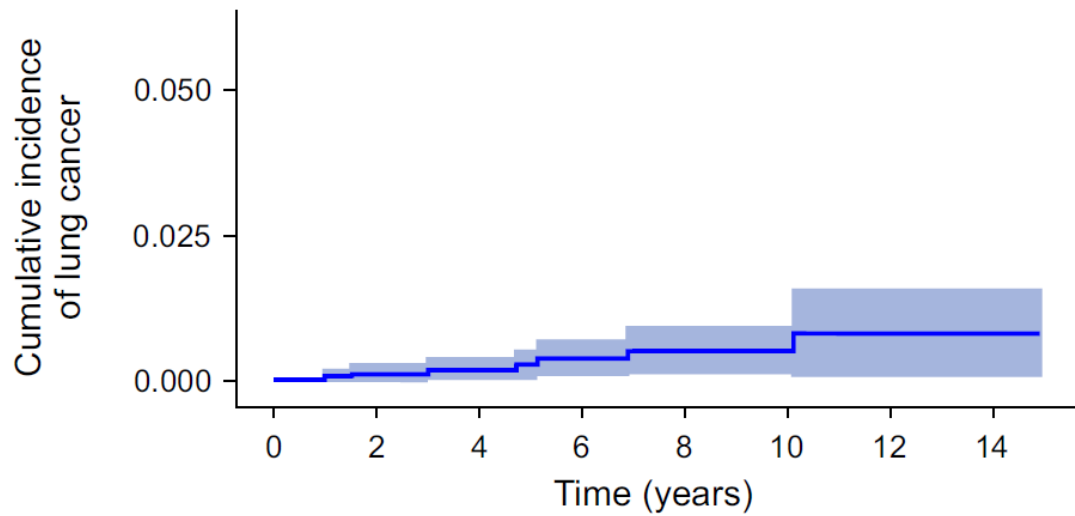

|                   |     |      |      |       |       |       |       |       |
|-------------------|-----|------|------|-------|-------|-------|-------|-------|
| Number at risk    | 202 | 173  | 131  | 81    | 46    | 29    | 14    | 5     |
| (number censored) | (0) | (25) | (62) | (108) | (142) | (159) | (173) | (182) |

**Supplementary Figure S2.** Cumulative incidence of lung carcinoma occurring after the diagnosis of PLCH. The shaded area represents the 95% confidence interval.

PLCH: pulmonary Langerhans cell histiocytosis.

## Supplementary references

1. Lorillon G, Tazi A. How I manage pulmonary Langerhans cell histiocytosis. *Eur Respir Rev* 2017; 26: 170070.
2. Tazi A, de Margerie-Mellon C, Vercellino L, Naccache JM, Fry S, Dominique S, Jouneau S, Lorillon G, Bugnet E, Chiron R, Wallaert B, Valeyre D, Chevret S. Extrathoracic investigation in adult patients with isolated pulmonary langerhans cell histiocytosis. *Orphanet J Rare Dis* 2016; 11: 11.
3. Gupta N, Vassallo R, Wikenheiser-Brokamp KA, McCormack FX. Diffuse Cystic Lung Disease. Part II. *Am J Respir Crit Care Med* 2015; 192: 17-29.
4. Gupta N, Vassallo R, Wikenheiser-Brokamp KA, McCormack FX. Diffuse Cystic Lung Disease. Part I. *Am J Respir Crit Care Med* 2015; 191: 1354-1366.
5. Raof S, Bondalapati P, Vydula R, Ryu JH, Gupta N, Raof S, Galvin J, Rosen MJ, Lynch D, Travis W, Mehta S, Lazzaro R, Naidich D. Cystic Lung Diseases: Algorithmic Approach. *Chest* 2016; 150: 945-965.
6. Vassallo R, Harari S, Tazi A. Current understanding and management of pulmonary Langerhans cell histiocytosis. *Thorax* 2017; 72: 937-945.
