# Supplementary material
Source: HighWire-hosted journal article supplement (https://erj.ersjournals.com/content/59/5/2101017)
Supplement: inline-supplementary-material-2 [file inline-supplementary-material-2.pdf]

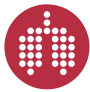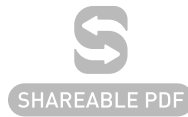

# Long-term outcomes of adult pulmonary Langerhans cell histiocytosis: a prospective cohort

Amira Benattia<sup>1</sup>, Emmanuelle Bugnet<sup>1</sup>, Anouk Walter-Petrich<sup>2,3</sup>, Constance de Margerie-Mellon<sup>4,5</sup>,  
Véronique Meignin<sup>6</sup>, Agathe Seguin-Givelet<sup>7</sup>, Gwenaël Lorillon<sup>1</sup>, Sylvie Chevret<sup>2,3</sup> and Abdellatif Tazi<sup>1,8</sup>

<sup>1</sup>Centre National de Référence des Histiocytoses, Service de Pneumologie, AP-HP, Hôpital Saint-Louis, Paris, France. <sup>2</sup>Biostatistics and Clinical Epidemiology Research Team (ECSTRRA), INSERM UMR-1153 (CRESS), Université de Paris, Paris, France. <sup>3</sup>Service de Biostatistique et Information Médicale, AP-HP, Hôpital Saint-Louis, Paris, France. <sup>4</sup>Université de Paris, INSERM UMR-1149, Paris, France. <sup>5</sup>Service de Radiologie, AP-HP, Hôpital Saint-Louis, Paris, France. <sup>6</sup>Service de Pathologie, AP-HP, Hôpital Saint-Louis, Paris, France. <sup>7</sup>Département Thoracique, Institut du Thorax Curie-Montsouris, Institut Mutualiste Montsouris, Paris, France. <sup>8</sup>Human Immunology Pathophysiology and Immunotherapy (HIPI) Unit, INSERM UMR-976, Institut de Recherche Saint-Louis, Université de Paris, Paris, France.

Corresponding author: Abdellatif Tazi ([abdellatif.tazi@aphp.fr](mailto:abdellatif.tazi@aphp.fr))

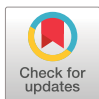

Shareable abstract (@ERSpublications)

The long-term prognosis of PLCH is significantly more favourable than has previously been reported. Patients must be closely monitored after diagnosis to detect and manage severe complications early. <https://bit.ly/3asyshv>

**Cite this article as:** Benattia A, Bugnet E, Walter-Petrich A, *et al.* Long-term outcomes of adult pulmonary Langerhans cell histiocytosis: a prospective cohort. *Eur Respir J* 2022; 59: 2101017 [DOI: 10.1183/13993003.01017-2021].

This single-page version can be shared freely online.

Copyright ©The authors 2022.  
For reproduction rights and  
permissions contact  
[permissions@ersnet.org](mailto:permissions@ersnet.org)

Received: 8 April 2021  
Accepted: 2 Oct 2021

## Abstract

**Background** The long-term outcomes of adult pulmonary Langerhans cell histiocytosis (PLCH), particularly survival, are largely unknown. Two earlier retrospective studies reported a high rate of mortality, which contrasts with our clinical experience.

**Methods** To address this issue, all patients with newly diagnosed PLCH referred to the French national reference centre for histiocytoses between 2004 and 2018 were eligible for inclusion. The primary outcome was survival, which was defined as the time from inclusion to lung transplantation or death from any cause. Secondary outcomes included the cumulative incidences of chronic respiratory failure (CRF), pulmonary hypertension (PH), malignant diseases and extrapulmonary involvement in initially isolated PLCH. Survival was estimated using the Kaplan–Meier method.

**Results** 206 patients (mean age 39±13 years, 60% female, 95% current smokers) were prospectively followed for a median duration of 5.1 years (IQR 3.2–7.6 years). Of these, 12 patients (6%) died. The estimated rate of survival at 10 years was 93% (95% CI 89–97%). The cumulative incidences of CRF and/or PH were <5% at both 5 and 10 years, and 58% of these patients died. 27 malignancies were observed in 23 patients. The estimated standardised incidence ratio of lung carcinoma was 17.0 (95% CI 7.45–38.7) compared to an age- and sex-matched French population. Eight (5.1%) of the 157 patients with isolated PLCH developed extrapulmonary involvement.

**Conclusion** The long-term prognosis of PLCH is significantly more favourable than has previously been reported. Patients must be closely monitored after diagnosis to detect severe complications early.
